# Supplementary material for: Nonaqueous synthesis of crystalline anatase nanoparticles in simple ketones and aldehydes as oxygen-supplying agents
Source: Royal Society of Chemistry journal article supplement (doi:10.1039/b414510k), 2004-11-29
Supplement: b414510k.doc [file b414510k.doc]

*1. Experimental Details*

The ketones and aldehydes were used as received in p.a./dry quality by Acros Organics. For a special experiment, acetone was dried over mole sieve 4 Å and distilled before use, however the results were similar when using the as-received chemical. Next, the solvents were mixed with titanium tetraisopropoxide, Ti(O*i*Pr)4 (Aldrich, 99.999%), in a glove box under Ar. Yield and crystallinity were best when using a molar ratio of 10:1. Solvothermal treatment was performed in acid digestion bombs with 23 mL Teflon cup holders, Parr Instruments, which were sealed, removed from the glove box and further treated as specified in the Communication.

*2. TEM Images*

Further TEM micrographs are presented, measured on a Zeiss EM 912 instrument at an acceleration voltage of 120kV (Fig. 1).


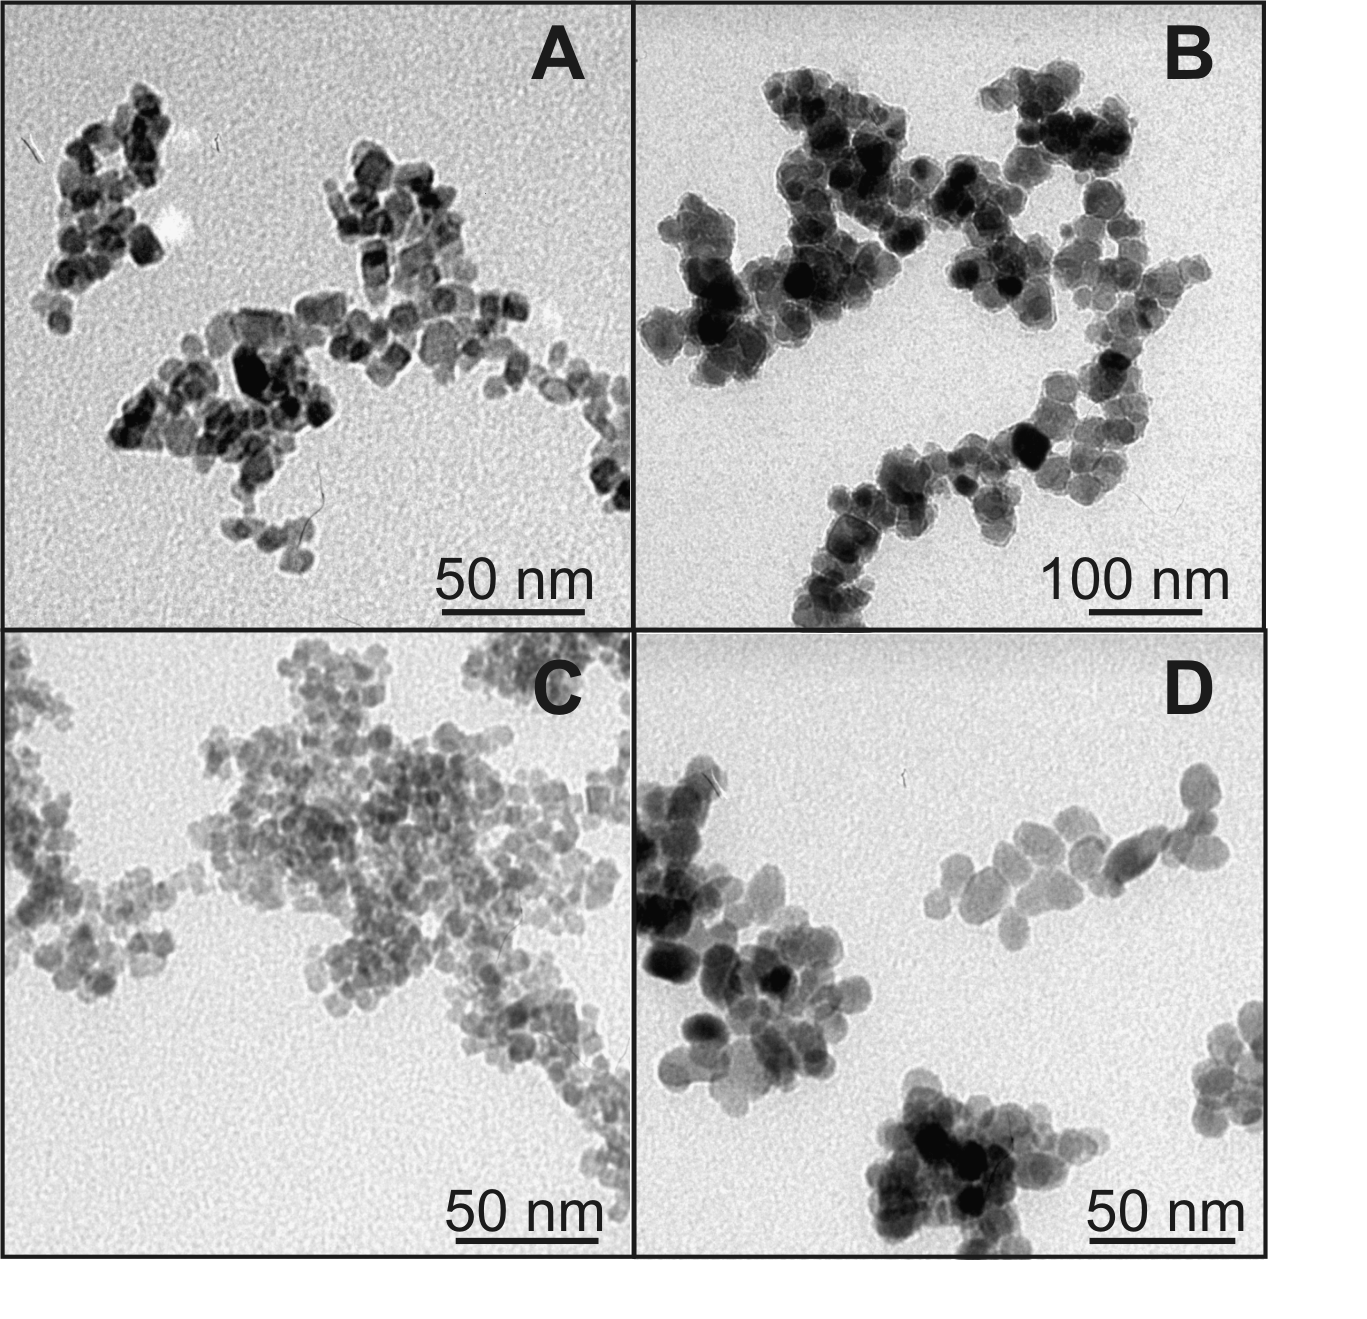


Fig. 1: TEM micrographs of particles prepared in acetophenone (**A**), 3-pentanone (**B**), benzaldehyde (**C**) and butyraldehyde (**D**).

The particles are aggregated to some extent, but can nevertheless clearly be distinguished. For all systems investigated, they are rather uniform in size and shape. However, significant differences can bee seen when comparing the images: in aromatic solvents (**A**/**C**), the particles are significantly smaller compared to the aliphatic systems (**B**/**D**). On the other hand, when comparing the ketones vs. aldehydes, it is seen that smaller particles were obtained in aldehydes. This corresponds well with the observations made from crystallite size calculation from XRD diffractograms, as discussed in the Communication.

*3. NMR Data*

a. Acetone System

Identified compounds (beside acetone and isopropanol):

*Mesityl oxide (4-methyl-3-penten-2-one)*: 13C NMR =198.6 (C2), 155.0 (C4), 124.1 (C3), 31.6 (C1), 27.5, 20.5 (CCH3).

*Phorone (2,6-dimethyl-2,5-heptadiene-4-one)*: =191.4 (C4), 154.2 (C2/6), 126.1 (C3/5), 27.7, 20.5 (CH3 superimposed with mesityl oxide peaks).

*Mesitylene*: =137.6, 126.8 (CPh), 21.1 (CH3).

b. Cyclohexanone System

Cyclohexanone and cyclohexanol and acetone are not discussed in detail.

*2-(1-cyclohexenyl)cyclohexanone*: 13C NMR =211.6 (Ccarbonyl), 135.7, 123.5 (CC=C), 58.6 (CH), 42.1*, 31.7, 27.5, 27.2*, 25.4*, 24.8, 22.8, 22.3 (CH2, *superimposed by cyclohexane/cyclohexanol peaks).

c. Benzophenone System

Benzophenone and benzhydrol are not discussed in detail.

*4,4-diphenyl-3-buten-2-one*:=200.0 (C2), 153.9 (C4), 141.1 (CPh, other aromatic signals superimposed by benzophenone), 115.7 (C3), 30.3 (CH3).

d. Benzaldehyde System

Benzaldehyde, benzyl alcohol and benzyl benzoate are not discussed in detail.

*4-phenyl-2-butanone*: 13C NMR =207.4 (C2), 141.1 (CPh/Subst), 128.5-126.1 (CPh superimposed by benzaldehyde, benzyl alcohol and benzyl benzoate), 45.1 (C4), 30.1 (C1), 29.7 (C3).

*4-phenyl-3-buten-2-one*: 13C NMR =198.8 (C2), 143.5 (C3), 131.5-125.4 (C4 and CPh superimposed by aromatic compounds), 27.5 (C1).

*4. TGA Data*

The samples were measured on a Netzsch TG 209 instrument under N2 atmosphere, employing a heating rate of 20°C/min, ramping up to 750°C.


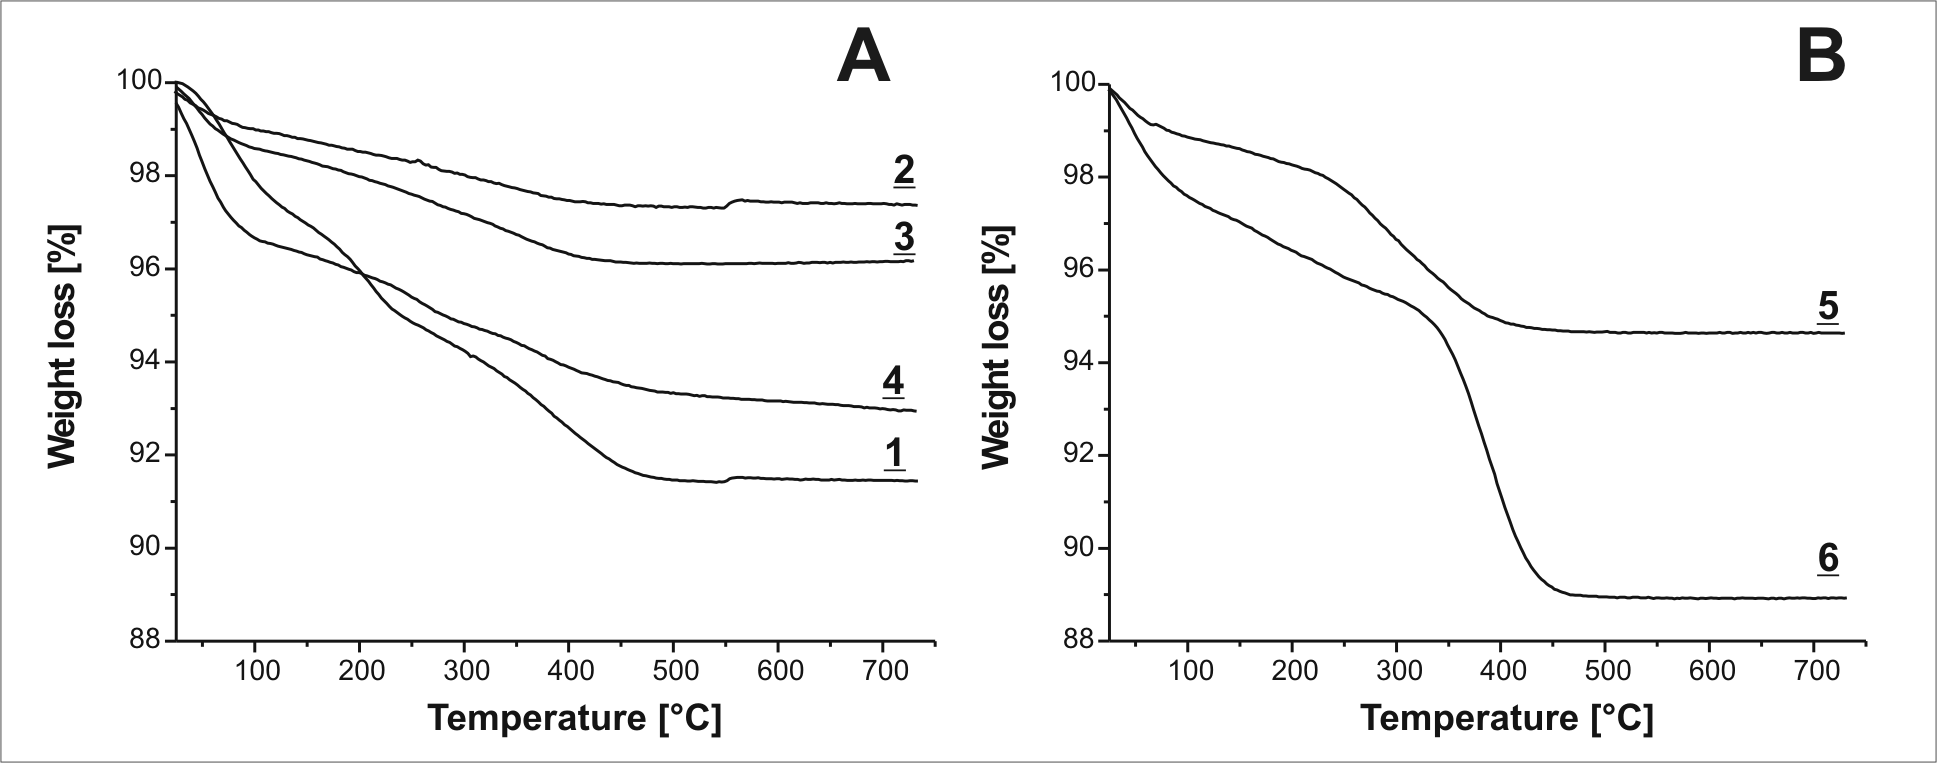


Fig. 2: Thermograms of particles prepared in various ketones (**A**) and aldehydes (**B**).

The TGA plots of particles prepared in various ketones (**A**) and aldehydes (**B**) after short drying in vacuo are shown in Fig. 2. The solvents are 1: acetone, 2: 2-butanone, 3: cyclohexanone, 4: acetophenone, 5: butyraldehyde, 6: benzaldehyde. The graphs show a more or less strong decrease below 150°C for all samples which is mainly attributed to adsorbed moisture or organic solvents. Above 200°C, the higher aliphatic ketones remain practically constant in weight, whereas a second step is clearly visible for acetone and acetophenone (the thermogram for benzophenone is similar to acetophenone and is therefore not shown). The decrease at higher temperatures is assigned to organic ligands bound to the particle surface rather strongly, conceivably in the form of enolates or aldolates.

For aldehydes, generally a higher amount of adsorbed organic species is observed. Butyraldehyde shows a decrease by ca. 3% in the range of 250-400°C, whereas for benzaldehyde, the sample weight decreases by over 6% between 300 and 400°C, again showing that aromatic systems bind more strongly to the titania.
